# Supplementary material for: Gene Expression Profiling in Fibromyalgia Indicates an Autoimmune Origin of the Disease and Opens New Avenues for Targeted Therapy
Source: MDPI journal article supplement (doi:10.3390/jcm9061814), 2020-06-10
Supplement: s1 [file s1]

**Supplementary table 1. Sequences of primers used for the detection of LncRNAs**

| <b>LncRNA</b>        | <b>Left primer</b>    | <b>Right primer</b>   |
|----------------------|-----------------------|-----------------------|
| <b>CTD-2651B20.6</b> | GAAGAGTTCAGGCGACAAGC  | CCACAATGTTGTGAACTCAGG |
| <b>RP1-151F17.1</b>  | GCAACTCCGGAAAGTTTCAA  | CGGTTGCTTTCTCTGTCTCC  |
| <b>AC009299.3</b>    | GGTCTAAGCCCCAAGAAAGG  | GAGATCTTCCACCACGGAAA  |
| <b>RP11-283I3.6</b>  | TATGGTGGCATA CGCCTGTA | GATACTTGGGCTCCCTGTGA  |
| <b>RP11-747H7.3</b>  | CCATGTTCTTTGGGAATGCT  | GGACTTCCCAGTTGCCATAA  |
