# Supplementary material for: Gene Expression Profiling in Fibromyalgia Indicates an Autoimmune Origin of the Disease and Opens New Avenues for Targeted Therapy
Source: MDPI journal article supplement (doi:10.3390/jcm9061814), 2020-06-10
Supplement: s1 [file s1]

| <b>Fold Change</b> | <b>Gene Symbol</b> | <b>miRNA target</b> | <b>Description</b>                                             |
|--------------------|--------------------|---------------------|----------------------------------------------------------------|
| 22.6               | RP3-496C20.1       | no miRNA target     | novel transcript, antisense to FAM83F                          |
| 19.68              | RP11-449G16.1      | no miRNA target     | novel transcript, sense intronic to MAP4K3                     |
| 13.86              | RP11-166B2.3       | no miRNA target     | novel transcript sense intronic to GSPT1                       |
| 12.34              | AC017002.2         | no miRNA target     | novel transcript                                               |
| 9.45               | RP11-769O8.3       | no miRNA target     | novel variant, sense intronic to YES1                          |
| 8.19               | RP11-656E20.5      | no miRNA target     | novel transcript                                               |
| 7.76               | ASAP1-IT1          | no miRNA target     | ASAP1 intronic transcript 1                                    |
| 7.16               | RP11-242C19.2      | no miRNA target     | novel transcript, sense intronic to GK                         |
| 6.47               | RP1-168P16.2       | no miRNA target     | novel transcript                                               |
| 6.18               | LINC01272          | no miRNA target     | long intergenic non-protein coding RNA 1272                    |
| 5.88               | RP11-134L10.1      | no miRNA target     | novel transcript antisense to C7orf49                          |
| 5.69               | RP11-138A9.1       | no miRNA target     | novel transcript                                               |
| 5.63               | LOC100133331       | no miRNA target     | uncharacterized LOC100133331                                   |
| 5.38               | RP11-274J7.2       | no miRNA target     | novel transcript                                               |
| 5.37               | CATIP-AS1          | no miRNA target     | CATIP antisense RNA 1                                          |
| 5.25               | RC3H1-IT1          | no miRNA target     | RC3H1 intronic transcript 1 (non-protein coding)               |
| 5.23               | CTD-2651B20.6      | 2 miRNAs targets    | novel transcript                                               |
| 5.2                | CTB-131B5.2        | no miRNA target     | novel transcript                                               |
| 4.82               | LINC-PINT          | no miRNA target     | long intergenic non-protein coding RNA, p53 induced transcript |
| 4.76               | RP11-327F22.6      | no miRNA target     | novel transcript                                               |
| 4.65               | RP1-151F17.1       | 15 miRNAs targets   | novel transcript                                               |
| 4.56               | RP11-380G5.2       | no miRNA target     | Jeck2013 ALT_ACCEPTOR, ALT_DONOR, coding, INTERNAL,            |
| 4.31               | RP11-318K15.2      | no miRNA target     | putative novel transcript                                      |
| 4.25               | RP11-707G18.1      | no miRNA target     | novel transcript                                               |
| 4.22               | RP11-44N11.1       | no miRNA target     | novel transcript                                               |
| 4.21               | CTC-428H11.2       | no miRNA target     | novel transcript antisense to RASA1                            |
| 4.18               | RP11-333J10.2      | no miRNA target     | novel transcript, sense intronic AATF                          |
| 4.14               | LINC01001          | no miRNA target     | long intergenic non-protein coding RNA 1001                    |
| 4.1                | GK-AS1             | no miRNA target     | GK antisense RNA 1 [Source:HGNC Symbol                         |
| 4.09               | RP11-151N17.1      | no miRNA target     | novel transcript                                               |
| -4.31              | RP4-607I7.1        | no miRNA target     | novel transcript                                               |
| -4.32              | RP11-61O1.2        | no miRNA target     | novel transcript                                               |
| -4.35              | AC093609.1         | no miRNA target     | novel gene                                                     |

|        |               |                   |                                             |
|--------|---------------|-------------------|---------------------------------------------|
| -4.43  | WDR11-AS1     | no miRNA target   | WDR11 antisense RNA 1                       |
| -4.52  | AC009299.3    | 29 miRNAs targets | novel transcript                            |
| -4.54  | LINC00861     | no miRNA target   | long intergenic non-protein coding RNA 861  |
| -4.74  | RP11-730K11.1 | no miRNA target   | novel transcript, antisense to SORL1        |
| -5.05  | RP11-283I3.6  | 1 mirna target    | novel transcript                            |
| -5.18  | PRKCQ-AS1     | no miRNA target   | PRKCQ antisense RNA 1                       |
| -5.32  | RP4-791M13.3  | no miRNA target   | novel transcript                            |
| -5.88  | AC093642.4    | no miRNA target   | novel transcript                            |
| -6.71  | CHRM3-AS2     | no miRNA target   | CHRM3 antisense RNA 2                       |
| -6.8   | RP11-18H21.1  | no miRNA target   | novel transcript                            |
| -6.86  | LINC00402     | no miRNA target   | long intergenic non-protein coding RNA 402  |
| -8.47  | RP11-190C22.9 | no miRNA target   | novel transcript, antisense to ADPRH        |
| -9     | RP11-747H7.3  | 8 miRNAs targets  | novel transcript, intronic to CATSPERB      |
| -9.1   | RP5-1180E21.5 | no miRNA target   | novel transcript, antisense to CEPT1        |
| -9.37  | LINC01550     | no miRNA target   | long intergenic non-protein coding RNA 1550 |
| -9.48  | LINC00989     | no miRNA target   | long intergenic non-protein coding RNA 989  |
| -9.53  | RP11-664D1.1  | no miRNA target   | novel transcript                            |
| -10.68 | RP11-160E2.11 | no miRNA target   | novel transcript                            |
| -10.69 | KCNJ2-AS1     | no miRNA target   | KCNJ2 antisense RNA 1 (head to head)        |
| -11.07 | AC084082.3    | no miRNA target   | novel transcript                            |







uc063agg.1
