# Supplementary material for: Gene Expression Profiling in Fibromyalgia Indicates an Autoimmune Origin of the Disease and Opens New Avenues for Targeted Therapy
Source: MDPI journal article supplement (doi:10.3390/jcm9061814), 2020-06-10
Supplement: s1 [file s1]

## Genes included in the six modules

| M1     | M2       | M3         | M4      | M5         | M6      |
|--------|----------|------------|---------|------------|---------|
| ASB6   | C5AR1    | ADAM8      | ALYREF  | ADAM17     | ARL8A   |
| CDC16  | CCL20    | AKAP9      | AREG    | AGFG1      | ATM     |
| CUL1   | CCL3     | ATP6VOC    | B7RP1   | AP2A2      | BBS10   |
| DZIP3  | CCL4L1   | BORA       | BCAS2   | ASH2L      | BHLHE40 |
| FBXL4  | CD40LG   | BUB3       | BCL2L11 | BIVM-ERCC5 | BRI3    |
| FBXO11 | CNR2     | CBX4       | BET1    | BNIP1      | CASP9   |
| KBTBD8 | CSF1     | CCL7       | BUD31   | BTLA       | CCNT1   |
| KLHL21 | CX3CR1   | CD93       | CBX5    | C12orf65   | CEBPB   |
| LMO7   | CXCL16   | CEACAM1    | CDKN1A  | CCNE1      | CHEK1   |
| LONRF1 | CXCL3    | CENPC      | CDKN1B  | CCNH       | CRY1    |
| MYLIP  | CXCR6    | CENPJ      | CLP1    | CD27       | CRY2    |
| RNF111 | FPR1     | CEP162     | COMMD10 | CD58       | CTDP1   |
| RNF114 | GNB2     | CEP192     | COMMD5  | CDC45      | CTPS1   |
| RNF138 | GNG11    | CEP290     | COMMD6  | CEBPA      | CTPS2   |
| RNF19A | GNG2     | CEP70      | CPSF2   | CREB1      | DDIT3   |
| RNF34  | GNG5     | CEP97      | CSTF1   | CTSB       | EAF1    |
| SIAH1  | GPR18    | CFD        | CTNNB1  | DNM3       | EIF5    |
| SMURF1 | GPR37L1  | CLEC12A    | CWC22   | EXOSC10    | FAM120B |
| SOCS1  | IFNG     | CLEC5A     | CWC27   | FAM20C     | FEN1    |
| TRIM39 | IL1B     | CLU        | DBF4    | FAS        | IPO8    |
| UBA3   | IL1R1    | CSNK1D     | DPY30   | FLT1       | JUND    |
| UBE2A  | ITGAX    | DNMT3A     | ETF1    | FOSB       | KCNQ5   |
| UBE2H  | P2RY12   | EZH2       | FEM1C   | FURIN      | LPCAT1  |
| UBE2M  | PF4      | F13A1      | FOXO3   | GNA12      | MED27   |
| UBE2S  | PPBP     | FERMT3     | GATAD2A | GNA13      | MLLT3   |
| UBE2V2 | S1PR1    | HDAC1      | GP1BA   | GNA15      | MRPL57  |
|        | TAS2R14  | HDAC5      | GRIA1   | GNAZ       | MRPS23  |
|        | TLR10    | HIST1H2AB  | HIF1A   | GNL1       | MRPS5   |
|        | TLR7     | HIST1H2AE  | HSPA5   | H2AFX      | NFIL3   |
|        | TNFRSF1B | HIST1H2BB  | ITGA2B  | HAVCR2     | PDF     |
|        | TNFSF11  | HIST1H2BC  | LEF1    | HBEGF      | PER1    |
|        |          | HIST1H2BD  | NFKB2   | JAG1       | PER2    |
|        |          | HIST1H2BF  | ORC3    | KIF1B      | PLEC    |
|        |          | HIST1H2BG  | ORC5    | KIF20B     | PRMT2   |
|        |          | HIST1H2BI  | ORC6    | LDLRAP1    | PRMT3   |
|        |          | HIST1H2BL  | PPARG   | LTBP1      | RPL7A   |
|        |          | HIST1H2BO  | PPIE    | MAFB       | RPS14   |
|        |          | HIST1H3A   | PPIL1   | MAPKAPK2   | RPS26   |
|        |          | HIST1H4F   | PPP2R2A | MCM3       | RPS3    |
|        |          | HIST2H2AA  | PRC1    | MCM6       | SRP19   |
|        |          | HIST2H2AA3 | RAB1A   | MEIS1      | THRAP3  |
|        |          | HIST2H2BE  | SEC23IP | MRPL12     | TTC37   |
|        |          | HIST2H3D   | SEC24A  | MRPL17     | UTP6    |
|        |          | IL10       | SF3B3   | MSH2       |         |

|          |          |           |
|----------|----------|-----------|
| IL16     | SMG1     | MTIF2     |
| IL1A     | SPP1     | MTIF3     |
| IL6      | SRC      | NAT10     |
| ITGB3BP  | SRRT     | NBAS      |
| KDM6B    | TCF7     | P4HB      |
| KIF2A    | TNFRSF4  | PLCB1     |
| LILRB2   | TNFSF4   | PNO1      |
| MGAM     | TRAF5    | POLR3B    |
| MMP9     | TRAPPC4  | PSMA4     |
| MMRN1    | TRAPPC6B | RPA2      |
| NBEAL2   | UPF1     | SDC2      |
| NDEL1    | USO1     | SEC61A2   |
| NFKB1    | ZEB1     | SNX9      |
| NHLRC2   |          | STON2     |
| NOD2     |          | SURF4     |
| NSL1     |          | TFRC      |
| NUP43    |          | TIMP1     |
| ORM2     |          | TNFRSF12A |
| PHC2     |          | TRMT1L    |
| PLK4     |          | TRMT6     |
| PPP2CA   |          | UBTF      |
| PRKAR2B  |          | WASL      |
| RANBP2   |          | WDR3      |
| RANGAP1  |          | XPC       |
| RCC2     |          |           |
| RELB     |          |           |
| RPGRIP1L |          |           |
| SEC13    |          |           |
| SELP     |          |           |
| SIGLEC14 |          |           |
| SKA2     |          |           |
| SLC11A1  |          |           |
| SPARC    |          |           |
| SVIP     |          |           |
| THBS1    |          |           |
| TNF      |          |           |
| TRAF3    |          |           |
| TUBA4A   |          |           |
| TUBB4B   |          |           |
| TUBGCP4  |          |           |
| VEGFA    |          |           |
