# Supplementary material for: Gene Expression Profiling in Fibromyalgia Indicates an Autoimmune Origin of the Disease and Opens New Avenues for Targeted Therapy
Source: MDPI journal article supplement (doi:10.3390/jcm9061814), 2020-06-10
Supplement: s1 [file s1]

|                                               | <b>GO biological process complete</b>                                                             | <b><i>p-value</i></b> |
|-----------------------------------------------|---------------------------------------------------------------------------------------------------|-----------------------|
| <b>APOPTOSIS</b>                              | apoptotic process (GO:0006915)                                                                    | <0.01                 |
| APOPTOSIS                                     | programmed cell death (GO:0012501)                                                                | <0.01                 |
| APOPTOSIS                                     | regulation of programmed cell death (GO:0043067)                                                  | <0.01                 |
| APOPTOSIS                                     | extrinsic apoptotic signaling pathway (GO:0097191)                                                | <0.01                 |
| APOPTOSIS                                     | regulation of apoptotic process (GO:0042981)                                                      | <0.01                 |
| APOPTOSIS                                     | intrinsic apoptotic signaling pathway in response to DNA damage (GO:0008630)                      | <0.01                 |
| APOPTOSIS                                     | intrinsic apoptotic signaling pathway (GO:0097193)                                                | <0.01                 |
| APOPTOSIS                                     | Fas signaling pathway (GO:0036337)                                                                | 0.03                  |
| APOPTOSIS                                     | canonical Wnt signaling pathway involved in negative regulation of apoptotic process (GO:0042981) | 0.04                  |
| <b>AUTOPHAGY</b>                              | autophagy (GO:0006914)                                                                            | <0.01                 |
| AUTOPHAGY                                     | process utilizing autophagic mechanism (GO:0061919)                                               | <0.01                 |
| <b>CELL ADHESION</b>                          | positive regulation of cell-cell adhesion (GO:0022409)                                            | <0.01                 |
| CELL ADHESION                                 | negative regulation of cell junction assembly (GO:1901889)                                        | <0.01                 |
| CELL ADHESION                                 | regulation of adherens junction organization (GO:1903391)                                         | 0.01                  |
| <b>CELL PROLIFERATION</b>                     | cell cycle (GO:0007049)                                                                           | <0.01                 |
| CELL PROLIFERATION                            | negative regulation of cell population proliferation (GO:0008285)                                 | <0.01                 |
| CELL PROLIFERATION                            | negative regulation of epithelial cell proliferation (GO:0050680)                                 | 0.02                  |
| <b>CIRCADIAN RHYTHM ASSOCIATED MECHANISMS</b> | circadian regulation of gene expression (GO:0032922)                                              | <0.01                 |
| CIRCADIAN RHYTHM                              | entrainment of circadian clock (GO:0009649)                                                       | <0.01                 |
| CIRCADIAN RHYTHM                              | photoperiodism (GO:0009648)                                                                       | 0.01                  |
| <b>EXOCYTOSIS</b>                             | regulated exocytosis (GO:0045055)                                                                 | <0.01                 |
| EXOCYTOSIS                                    | exocytosis (GO:0006887)                                                                           | <0.01                 |
| EXOCYTOSIS                                    | vesicle-mediated transport (GO:0016192)                                                           | <0.01                 |
| <b>IMMUNE RESPONSE</b>                        | immune system process (GO:0002376)                                                                | <0.01                 |
| IMMUNE RESPONSE                               | response to lipopolysaccharide (GO:0032496)                                                       | <0.01                 |
| IMMUNE RESPONSE                               | response to molecule of bacterial origin (GO:0002237)                                             | <0.01                 |
| IMMUNE RESPONSE                               | immune response (GO:0006955)                                                                      | <0.01                 |
| IMMUNE RESPONSE                               | regulation of immune system process (GO:0002682)                                                  | <0.01                 |
| IMMUNE RESPONSE                               | leukocyte activation (GO:0045321)                                                                 | <0.01                 |
| IMMUNE RESPONSE                               | cellular response to biotic stimulus (GO:0071216)                                                 | <0.01                 |
| IMMUNE RESPONSE                               | cellular response to lipopolysaccharide (GO:0071222)                                              | <0.01                 |
| IMMUNE RESPONSE                               | cellular response to molecule of bacterial origin (GO:0071219)                                    | <0.01                 |
| IMMUNE RESPONSE                               | myeloid leukocyte activation (GO:0002274)                                                         | <0.01                 |

|                 |                                                                       |       |
|-----------------|-----------------------------------------------------------------------|-------|
| IMMUNE RESPONSE | positive regulation of immune system process (GO:0002684)             | <0.01 |
| IMMUNE RESPONSE | myeloid cell activation involved in immune response (GO:0002275)      | <0.01 |
| IMMUNE RESPONSE | myeloid leukocyte mediated immunity (GO:0002444)                      | <0.01 |
| IMMUNE RESPONSE | neutrophil mediated immunity (GO:0002446)                             | <0.01 |
| IMMUNE RESPONSE | hematopoietic or lymphoid organ development (GO:0048534)              | <0.01 |
| IMMUNE RESPONSE | myeloid cell differentiation (GO:0030099)                             | <0.01 |
| IMMUNE RESPONSE | granulocyte activation (GO:0036230)                                   | <0.01 |
| IMMUNE RESPONSE | negative regulation of immune system process (GO:0002683)             | <0.01 |
| IMMUNE RESPONSE | leukocyte degranulation (GO:0043299)                                  | <0.01 |
| IMMUNE RESPONSE | neutrophil degranulation (GO:0043312)                                 | <0.01 |
| IMMUNE RESPONSE | immune system development (GO:0002520)                                | <0.01 |
| IMMUNE RESPONSE | leukocyte activation involved in immune response (GO:0002366)         | <0.01 |
| IMMUNE RESPONSE | cell activation involved in immune response (GO:0002263)              | <0.01 |
| IMMUNE RESPONSE | regulation of macrophage activation (GO:0043030)                      | <0.01 |
| IMMUNE RESPONSE | myeloid leukocyte differentiation (GO:0002573)                        | <0.01 |
| IMMUNE RESPONSE | immune effector process (GO:0002252)                                  | <0.01 |
| IMMUNE RESPONSE | neutrophil activation involved in immune response (GO:0002283)        | <0.01 |
| IMMUNE RESPONSE | defense response (GO:0006952)                                         | <0.01 |
| IMMUNE RESPONSE | response to other organism (GO:0051707)                               | <0.01 |
| IMMUNE RESPONSE | leukocyte differentiation (GO:0002521)                                | <0.01 |
| IMMUNE RESPONSE | positive regulation of T cell activation (GO:0050870)                 | <0.01 |
| IMMUNE RESPONSE | macrophage activation (GO:0042116)                                    | <0.01 |
| IMMUNE RESPONSE | regulation of T cell activation (GO:0050863)                          | <0.01 |
| IMMUNE RESPONSE | cellular response to leukemia inhibitory factor (GO:1990830)          | <0.01 |
| IMMUNE RESPONSE | response to leukemia inhibitory factor (GO:1990823)                   | <0.01 |
| IMMUNE RESPONSE | cellular response to interleukin-4 (GO:0071353)                       | <0.01 |
| IMMUNE RESPONSE | positive regulation of macrophage activation (GO:0043032)             | <0.01 |
| IMMUNE RESPONSE | positive regulation of regulatory T cell differentiation (GO:0045591) | 0.01  |
| IMMUNE RESPONSE | lymphocyte activation (GO:0046649)                                    | 0.01  |
| IMMUNE RESPONSE | B cell activation (GO:0042113)                                        | 0.01  |
| IMMUNE RESPONSE | regulation of interleukin-17 production (GO:0032660)                  | 0.01  |
| IMMUNE RESPONSE | alpha-beta T cell activation (GO:0046631)                             | 0.01  |
| IMMUNE RESPONSE | positive regulation of humoral immune response (GO:0002922)           | 0.01  |
| IMMUNE RESPONSE | CD40 signaling pathway (GO:0023035)                                   | 0.02  |

|                              |                                                                                            |       |
|------------------------------|--------------------------------------------------------------------------------------------|-------|
| IMMUNE RESPONSE              | regulation of T-helper 1 type immune response (GO:0002825)                                 | 0.02  |
| IMMUNE RESPONSE              | regulation of dendritic cell differentiation (GO:2001198)                                  | 0.02  |
| IMMUNE RESPONSE              | regulation of innate immune response (GO:0045088)                                          | 0.02  |
| IMMUNE RESPONSE              | regulation of interleukin-12 production (GO:0032655)                                       | 0.02  |
| IMMUNE RESPONSE              | regulation of antigen processing and presentation (GO:0002577)                             | 0.03  |
| IMMUNE RESPONSE              | positive regulation of T cell cytokine production (GO:0002726)                             | 0.03  |
| IMMUNE RESPONSE              | complement component C5a signaling pathway (GO:0038178)                                    | 0.03  |
| IMMUNE RESPONSE              | memory T cell activation (GO:0035709)                                                      | 0.03  |
| IMMUNE RESPONSE              | negative regulation of natural killer cell mediated cytotoxicity directed against tumor ce | 0.03  |
| IMMUNE RESPONSE              | negative regulation of natural killer cell mediated immune response to tumor cell (GO:C    | 0.03  |
| IMMUNE RESPONSE              | negative regulation of immune response to tumor cell (GO:0002838)                          | 0.03  |
| IMMUNE RESPONSE              | negative regulation of response to tumor cell (GO:0002835)                                 | 0.03  |
| IMMUNE RESPONSE              | negative regulation of interleukin-13 production (GO:0032696)                              | 0.03  |
| IMMUNE RESPONSE              | B cell differentiation (GO:0030183)                                                        | 0.03  |
| IMMUNE RESPONSE              | regulation of regulatory T cell differentiation (GO:0045589)                               | 0.03  |
| IMMUNE RESPONSE              | defense response to virus (GO:0051607)                                                     | 0.03  |
| IMMUNE RESPONSE              | germinal center formation (GO:0002467)                                                     | 0.04  |
| IMMUNE RESPONSE              | B cell apoptotic process (GO:0001783)                                                      | 0.04  |
| IMMUNE RESPONSE              | adaptive immune response (GO:0002250)                                                      | 0.04  |
| IMMUNE RESPONSE              | regulation of immunoglobulin production (GO:0002637)                                       | 0.04  |
| IMMUNE RESPONSE              | B cell proliferation (GO:0042100)                                                          | 0.04  |
| IMMUNE RESPONSE              | T cell apoptotic process (GO:0070231)                                                      | 0.04  |
| IMMUNE RESPONSE              | monocyte activation (GO:0042117)                                                           | 0.04  |
| IMMUNE RESPONSE              | positive regulation of interleukin-17 production (GO:0032740)                              | 0.05  |
| IMMUNE RESPONSE              | regulation of T-helper 17 cell differentiation (GO:2000319)                                | 0.05  |
| IMMUNE RESPONSE              | type 2 immune response (GO:0042092)                                                        | 0.05  |
| IMMUNE RESPONSE              | leukocyte migration (GO:0050900)                                                           | <0.01 |
| IMMUNE RESPONSE              | somatic diversification of immune receptors (GO:0002200)                                   | 0.03  |
| <b>INFLAMMATORY RESPONSE</b> | leukocyte chemotaxis (GO:0030595)                                                          | <0.01 |
| INFLAMMATORY RESPONSE        | regulation of cytokine production (GO:0001817)                                             | <0.01 |
| INFLAMMATORY RESPONSE        | response to cytokine (GO:0034097)                                                          | <0.01 |
| INFLAMMATORY RESPONSE        | inflammatory response (GO:0006954)                                                         | <0.01 |
| INFLAMMATORY RESPONSE        | cellular response to cytokine stimulus (GO:0071345)                                        | <0.01 |
| INFLAMMATORY RESPONSE        | positive regulation of cytokine production (GO:0001819)                                    | <0.01 |

|                       |                                                                                        |       |
|-----------------------|----------------------------------------------------------------------------------------|-------|
| INFLAMMATORY RESPONSE | cytokine-mediated signaling pathway (GO:0019221)                                       | <0.01 |
| INFLAMMATORY RESPONSE | myeloid leukocyte migration (GO:0097529)                                               | <0.01 |
| INFLAMMATORY RESPONSE | regulation of MAPK cascade (GO:0043408)                                                | <0.01 |
| INFLAMMATORY RESPONSE | negative regulation of cytokine secretion (GO:0050710)                                 | <0.01 |
| INFLAMMATORY RESPONSE | granulocyte migration (GO:0097530)                                                     | <0.01 |
| INFLAMMATORY RESPONSE | regulation of macrophage migration (GO:1905521)                                        | <0.01 |
| INFLAMMATORY RESPONSE | response to tumor necrosis factor (GO:0034612)                                         | <0.01 |
| INFLAMMATORY RESPONSE | negative regulation of interleukin-6 secretion (GO:1900165)                            | <0.01 |
| INFLAMMATORY RESPONSE | regulation of inflammatory response (GO:0050727)                                       | <0.01 |
| INFLAMMATORY RESPONSE | regulation of interleukin-6 production (GO:0032675)                                    | <0.01 |
| INFLAMMATORY RESPONSE | cellular response to interleukin-1 (GO:0071347)                                        | <0.01 |
| INFLAMMATORY RESPONSE | chemokine-mediated signaling pathway (GO:0070098)                                      | 0.01  |
| INFLAMMATORY RESPONSE | response to interleukin-1 (GO:0070555)                                                 | 0.01  |
| INFLAMMATORY RESPONSE | regulation of tumor necrosis factor secretion (GO:1904467)                             | 0.01  |
| INFLAMMATORY RESPONSE | regulation of tumor necrosis factor biosynthetic process (GO:0042534)                  | 0.01  |
| INFLAMMATORY RESPONSE | regulation of p38MAPK cascade (GO:1900744)                                             | 0.01  |
| INFLAMMATORY RESPONSE | regulation of interleukin-8 production (GO:0032677)                                    | 0.02  |
| INFLAMMATORY RESPONSE | positive regulation of interferon-gamma production (GO:0032729)                        | 0.02  |
| INFLAMMATORY RESPONSE | wound healing involved in inflammatory response (GO:0002246)                           | 0.02  |
| INFLAMMATORY RESPONSE | regulation of interferon-gamma-mediated signaling pathway (GO:0060334)                 | 0.02  |
| INFLAMMATORY RESPONSE | regulation of response to interferon-gamma (GO:0060330)                                | 0.02  |
| INFLAMMATORY RESPONSE | regulation of prostaglandin secretion (GO:0032306)                                     | 0.02  |
| INFLAMMATORY RESPONSE | regulation of transforming growth factor beta production (GO:0071634)                  | 0.02  |
| INFLAMMATORY RESPONSE | positive regulation of tumor necrosis factor (ligand) superfamily member 11 production | 0.03  |
| INFLAMMATORY RESPONSE | positive regulation of interleukin-10 production (GO:0032733)                          | 0.03  |
| INFLAMMATORY RESPONSE | inflammatory response to wounding (GO:0090594)                                         | 0.03  |
| INFLAMMATORY RESPONSE | regulation of transforming growth factor beta receptor signaling pathway (GO:0017015)  | 0.03  |
| INFLAMMATORY RESPONSE | regulation of macrophage colony-stimulating factor signaling pathway (GO:1902226)      | 0.04  |
| <b>METABOLISM</b>     | regulation of metabolic process (GO:0019222)                                           | <0.01 |
| METABOLISM            | regulation of cellular metabolic process (GO:0031323)                                  | <0.01 |
| METABOLISM            | regulation of primary metabolic process (GO:0080090)                                   | <0.01 |
| METABOLISM            | regulation of macromolecule metabolic process (GO:0060255)                             | <0.01 |
| METABOLISM            | metabolic process (GO:0008152)                                                         | <0.01 |
| METABOLISM            | macromolecule metabolic process (GO:0043170)                                           | <0.01 |

|                       |                                                                                               |       |
|-----------------------|-----------------------------------------------------------------------------------------------|-------|
| METABOLISM            | positive regulation of nitrogen compound metabolic process (GO:0051173)                       | <0.01 |
| METABOLISM            | nitrogen compound metabolic process (GO:0006807)                                              | <0.01 |
| METABOLISM            | regulation of protein metabolic process (GO:0051246)                                          | <0.01 |
| METABOLISM            | regulation of steroid biosynthetic process (GO:0050810)                                       | <0.01 |
| METABOLISM            | positive regulation of hormone biosynthetic process (GO:0046886)                              | <0.01 |
| METABOLISM            | regulation of vitamin metabolic process (GO:0030656)                                          | <0.01 |
| METABOLISM            | regulation of vitamin D biosynthetic process (GO:0060556)                                     | <0.01 |
| METABOLISM            | positive regulation of proteasomal ubiquitin-dependent protein catabolic process (GO:0044095) | <0.01 |
| METABOLISM            | positive regulation of hormone metabolic process (GO:0032352)                                 | <0.01 |
| METABOLISM            | positive regulation of vitamin D biosynthetic process (GO:0060557)                            | 0.01  |
| METABOLISM            | regulation of cholesterol metabolic process (GO:0090181)                                      | 0.01  |
| METABOLISM            | mannose metabolic process (GO:0006013)                                                        | 0.02  |
| METABOLISM            | positive regulation of fatty acid transport (GO:2000193)                                      | 0.02  |
| METABOLISM            | negative regulation of ATP metabolic process (GO:1903579)                                     | 0.02  |
| METABOLISM            | IMP metabolic process (GO:0046040)                                                            | 0.03  |
| METABOLISM            | positive regulation of lipase activity (GO:0060193)                                           | 0.03  |
| METABOLISM            | positive regulation of RNA metabolic process (GO:0051254)                                     | <0.01 |
| METABOLISM            | DNA metabolic process (GO:0006259)                                                            | <0.01 |
| METABOLISM            | RNA metabolic process (GO:0016070)                                                            | <0.01 |
| METABOLISM            | cellular detoxification of aldehyde (GO:0110095)                                              | 0.03  |
| METABOLISM            | androgen metabolic process (GO:0008209)                                                       | 0.02  |
| <b>NERVOUS SYSTEM</b> | microglial cell migration (GO:1904124)                                                        | 0.03  |
| NERVOUS SYSTEM        | detection of chemical stimulus involved in sensory perception of smell (GO:0050911)           | <0.01 |
| NERVOUS SYSTEM        | detection of stimulus involved in sensory perception (GO:0050906)                             | <0.01 |
| NERVOUS SYSTEM        | detection of chemical stimulus involved in sensory perception (GO:0050907)                    | <0.01 |
| NERVOUS SYSTEM        | detection of stimulus (GO:0051606)                                                            | <0.01 |
| NERVOUS SYSTEM        | sensory perception of smell (GO:0007608)                                                      | <0.01 |
| NERVOUS SYSTEM        | sensory perception of chemical stimulus (GO:0007606)                                          | <0.01 |
| NERVOUS SYSTEM        | nervous system process (GO:0050877)                                                           | <0.01 |
| NERVOUS SYSTEM        | sensory perception (GO:0007600)                                                               | <0.01 |
| NERVOUS SYSTEM        | regulation of gliogenesis (GO:0014013)                                                        | <0.01 |
| NERVOUS SYSTEM        | regulation of neuroinflammatory response (GO:0150077)                                         | <0.01 |
| NERVOUS SYSTEM        | regulation of microglial cell migration (GO:1904139)                                          | <0.01 |
| NERVOUS SYSTEM        | trans-synaptic signaling (GO:0099537)                                                         | <0.01 |

|                                            |                                                                     |       |
|--------------------------------------------|---------------------------------------------------------------------|-------|
| NERVOUS SYSTEM                             | chemical synaptic transmission (GO:0007268)                         | <0.01 |
| NERVOUS SYSTEM                             | anterograde trans-synaptic signaling (GO:0098916)                   | <0.01 |
| NERVOUS SYSTEM                             | positive regulation of microglial cell migration (GO:1904141)       | <0.01 |
| NERVOUS SYSTEM                             | positive regulation of glial cell migration (GO:1903977)            | <0.01 |
| NERVOUS SYSTEM                             | synaptic signaling (GO:0099536)                                     | <0.01 |
| NERVOUS SYSTEM                             | regulation of amyloid-beta clearance (GO:1900221)                   | <0.01 |
| NERVOUS SYSTEM                             | regulation of neuron death (GO:1901214)                             | 0.01  |
| NERVOUS SYSTEM                             | regulation of neurogenesis (GO:0050767)                             | 0.01  |
| NERVOUS SYSTEM                             | regulation of oligodendrocyte differentiation (GO:0048713)          | 0.01  |
| NERVOUS SYSTEM                             | regulation of neuron apoptotic process (GO:0043523)                 | 0.02  |
| NERVOUS SYSTEM                             | axonogenesis (GO:0007409)                                           | 0.03  |
| NERVOUS SYSTEM                             | regulation of amyloid-beta formation (GO:1902003)                   | 0.03  |
| NERVOUS SYSTEM                             | axon guidance (GO:0007411)                                          | 0.03  |
| NERVOUS SYSTEM                             | neuron projection guidance (GO:0097485)                             | 0.03  |
| NERVOUS SYSTEM                             | glial cell activation (GO:0061900)                                  | 0.04  |
| NERVOUS SYSTEM                             | positive regulation of synaptic transmission (GO:0050806)           | 0.05  |
| <b>TISSUE REMODELING and MORPHOGENESIS</b> | regulation of tissue remodeling (GO:0034103)                        | <0.01 |
| TISSUE REMODELING and MORPHOGENESIS        | positive regulation of tissue remodeling (GO:0034105)               | <0.01 |
| TISSUE REMODELING and MORPHOGENESIS        | regulation of bone remodeling (GO:0046850)                          | <0.01 |
| TISSUE REMODELING and MORPHOGENESIS        | regulation of bone resorption (GO:0045124)                          | <0.01 |
| TISSUE REMODELING and MORPHOGENESIS        | osteoclast differentiation (GO:0030316)                             | <0.01 |
| TISSUE REMODELING and MORPHOGENESIS        | regulation of epithelial cell migration (GO:0010632)                | <0.01 |
| TISSUE REMODELING and MORPHOGENESIS        | regulation of ossification (GO:0030278)                             | <0.01 |
| TISSUE REMODELING and MORPHOGENESIS        | regulation of osteoblast differentiation (GO:0045667)               | 0.01  |
| TISSUE REMODELING and MORPHOGENESIS        | intestinal epithelial cell development (GO:0060576)                 | 0.02  |
| TISSUE REMODELING and MORPHOGENESIS        | columnar/cuboidal epithelial cell maturation (GO:0002069)           | 0.03  |
| TISSUE REMODELING and MORPHOGENESIS        | regulation of epithelial to mesenchymal transition (GO:0010717)     | 0.04  |
| TISSUE REMODELING and MORPHOGENESIS        | mammary gland duct morphogenesis (GO:0060603)                       | 0.04  |
| TISSUE REMODELING and MORPHOGENESIS        | branching involved in mammary gland duct morphogenesis (GO:0060444) | 0.01  |
| TISSUE REMODELING and MORPHOGENESIS        | connective tissue replacement (GO:0097709)                          | 0.01  |
| TISSUE REMODELING and MORPHOGENESIS        | regulation of muscle hypertrophy (GO:0014743)                       | 0.05  |
| TISSUE REMODELING and MORPHOGENESIS        | wound healing (GO:0042060)                                          | <0.01 |
| TISSUE REMODELING and MORPHOGENESIS        | response to wounding (GO:0009611)                                   | <0.01 |
| <b>TRANSCRIPTION</b>                       | regulation of nucleic acid-templated transcription (GO:1903506)     | <0.01 |

|                                         |                                                                                                   |       |
|-----------------------------------------|---------------------------------------------------------------------------------------------------|-------|
| TRANSCRIPTION                           | mitochondrial transcription (GO:0006390)                                                          | 0.03  |
| <b>VASCULAR SYSTEM</b>                  | regulation of endothelial cell differentiation (GO:0045601)                                       | <0.01 |
| VASCULAR SYSTEM                         | positive regulation of vascular endothelial growth factor receptor signaling pathway (GO:0045601) | <0.01 |
| VASCULAR SYSTEM                         | regulation of angiogenesis (GO:0045765)                                                           | 0.01  |
| VASCULAR SYSTEM                         | regulation of establishment of endothelial barrier (GO:1903140)                                   | 0.01  |
| VASCULAR SYSTEM                         | regulation of vascular smooth muscle cell proliferation (GO:1904705)                              | 0.02  |
| VASCULAR SYSTEM                         | negative regulation of blood vessel morphogenesis (GO:2000181)                                    | 0.02  |
| VASCULAR SYSTEM                         | response to angiotensin (GO:1990776)                                                              | 0.02  |
| VASCULAR SYSTEM                         | blood vessel maturation (GO:0001955)                                                              | 0.04  |
| VASCULAR SYSTEM                         | response to ischemia (GO:0002931)                                                                 | 0.04  |
| VASCULAR SYSTEM                         | blood coagulation (GO:0007596)                                                                    | <0.01 |
| VASCULAR SYSTEM                         | coagulation (GO:0050817)                                                                          | <0.01 |
| VASCULAR SYSTEM                         | hemostasis (GO:0007599)                                                                           | <0.01 |
| VASCULAR SYSTEM                         | platelet degranulation (GO:0002576)                                                               | <0.01 |
| <b>RESPONSE TO STIMULUS</b>             | cellular response to stimulus (GO:0051716)                                                        | <0.01 |
| RESPONSE TO STIMULUS                    | response to oxygen-containing compound (GO:1901700)                                               | <0.01 |
| RESPONSE TO STIMULUS                    | response to starvation (GO:0042594)                                                               | <0.01 |
| RESPONSE TO STIMULUS                    | cellular response to nutrient levels (GO:0031669)                                                 | <0.01 |
| RESPONSE TO STIMULUS                    | cellular response to oxidative stress (GO:0034599)                                                | <0.01 |
| RESPONSE TO STIMULUS                    | cellular response to amino acid starvation (GO:0034198)                                           | <0.01 |
| RESPONSE TO STIMULUS                    | response to hormone (GO:0009725)                                                                  | 0.01  |
| RESPONSE TO STIMULUS                    | response to steroid hormone (GO:0048545)                                                          | 0.02  |
| RESPONSE TO STIMULUS                    | response to UV (GO:0009411)                                                                       | 0.02  |
| RESPONSE TO STIMULUS                    | cellular response to manganese ion (GO:0071287)                                                   | 0.02  |
| RESPONSE TO STIMULUS                    | cellular response to hydrogen peroxide (GO:0070301)                                               | 0.03  |
| RESPONSE TO STIMULUS                    | cellular response to progesterone stimulus (GO:0071393)                                           | 0.04  |
| RESPONSE TO STIMULUS                    | response to clozapine (GO:0097338)                                                                | 0.04  |
| RESPONSE TO STIMULUS                    | response to lipid (GO:0033993)                                                                    | <0.01 |
| RESPONSE TO STIMULUS                    | response to stress (GO:0006950)                                                                   | <0.01 |
| RESPONSE TO STIMULUS                    | cellular response to stress (GO:0033554)                                                          | <0.01 |
| RESPONSE TO STIMULUS                    | regulation of response to stress (GO:0080134)                                                     | <0.01 |
| <b>REPRODUCTIVE SYSTEM/REPRODUCTION</b> | embryonic placenta development (GO:0001892)                                                       | <0.01 |
| REPRODUCTIVE SYSTEM/REPRODUCTION        | fertilization (GO:0009566)                                                                        | 0.03  |
| REPRODUCTIVE SYSTEM/REPRODUCTION        | tube development (GO:0035295)                                                                     | 0.03  |

|                                  |                                                                                   |       |
|----------------------------------|-----------------------------------------------------------------------------------|-------|
| REPRODUCTIVE SYSTEM/REPRODUCTION | single fertilization (GO:0007338)                                                 | 0.02  |
| OTHERS                           | regulation of kinase activity (GO:0043549)                                        | <0.01 |
|                                  | regulation of protein serine/threonine kinase activity (GO:0071900)               | <0.01 |
|                                  | regulation of developmental process (GO:0050793)                                  | <0.01 |
|                                  | regulation of body fluid levels (GO:0050878)                                      | <0.01 |
|                                  | regulation of protein secretion (GO:0050708)                                      | <0.01 |
|                                  | growth hormone secretion (GO:0030252)                                             | 0.02  |
|                                  | DNA damage checkpoint (GO:0000077)                                                | 0.02  |
|                                  | negative regulation of telomere maintenance via telomere lengthening (GO:1904357) | 0.03  |
|                                  | positive regulation of fever generation (GO:0031622)                              | 0.03  |
|                                  | iron ion transport (GO:0006826)                                                   | 0.03  |
|                                  | regulation of phosphorylation (GO:0042325)                                        | <0.01 |
|                                  | protein modification process (GO:0036211)                                         | <0.01 |
