# Supplementary material for: Gene Expression Profiling in Fibromyalgia Indicates an Autoimmune Origin of the Disease and Opens New Avenues for Targeted Therapy
Source: MDPI journal article supplement (doi:10.3390/jcm9061814), 2020-06-10
Supplement: s1 [file s1]

| miRNAs targets of the selected LncRNAs                                               |                 |                 |                 |                 |
|--------------------------------------------------------------------------------------|-----------------|-----------------|-----------------|-----------------|
| CTD-2651B20.6                                                                        | RP1-151F17.1    | AC009299.3      | RP11-283I3.6    | RP11-747H7.3    |
| hsa-miR-375                                                                          | hsa-mir-186-3p  | hsa-miR-143-3p  | hsa-miR-1306-3p | hsa-mir-130a-3p |
| hsa-miR-214-5p                                                                       | hsa-mir-148a    | hsa-miR-376a-3p |                 | hsa-miR-23a-3p  |
|                                                                                      | hsa-mir-148b    | hsa-miR-376b-3p |                 | hsa-mir-23b-3p  |
|                                                                                      | hsa-miR-152     | hsa-miR-425-5p  |                 | hsa-miR-23c     |
|                                                                                      | hsa-miR-214-5p  | hsa-miR-4770    |                 | hsa-miR-323a-3p |
|                                                                                      | hsa-miR-219-5p  | hsa-miR-6088    |                 | hsa-miR-6835-3p |
|                                                                                      | hsa-miR-4782-5p | hsa-let-7a-2    |                 | hsa-miR-135a2   |
|                                                                                      | hsa-miR-493-5p  | hsa-let-7b-5p   |                 | hsa-mir-367-3p  |
|                                                                                      | hsa-mir-6766    | hsa-let-7c      |                 |                 |
|                                                                                      | hsa-miR-758-3p  | hsa-let-7d-3p   |                 |                 |
|                                                                                      | hsa-miR-7-2-3p  | hsa-let-7e-3p   |                 |                 |
|                                                                                      | hsa-miR-200b-5p | hsa-let-7f-5p   |                 |                 |
|                                                                                      | hsa-mir-200c-3p | hsa-let-7g-5p   |                 |                 |
|                                                                                      | hsa-miR-3129-5p | hsa-let-7i-5p   |                 |                 |
|                                                                                      | hsa-miR-429     | hsa-miR-1271-3p |                 |                 |
|                                                                                      |                 | hsa-miR-182-3p  |                 |                 |
|                                                                                      |                 | hsa-miR-376c-3p |                 |                 |
|                                                                                      |                 | hsa-miR-4458    |                 |                 |
|                                                                                      |                 | hsa-miR-4500    |                 |                 |
|                                                                                      |                 | hsa-miR-495-3p  |                 |                 |
|                                                                                      |                 | hsa-miR-5688    |                 |                 |
|                                                                                      |                 | hsa-miR-6835-3p |                 |                 |
|                                                                                      |                 | hsa-miR-96-5p   |                 |                 |
|                                                                                      |                 | hsa-mir-98      |                 |                 |
|                                                                                      |                 | hsa-mir-142-3p  |                 |                 |
|                                                                                      |                 | hsa-miR-340-5p  |                 |                 |
|                                                                                      |                 | hsa-miR-378c    |                 |                 |
|                                                                                      |                 | hsa-miR-422a    |                 |                 |
|                                                                                      |                 | hsa-miR-5590-3p |                 |                 |
| Genes modulated in FM that are targeted by miRNA targets of the five selected LncRNA |                 |                 |                 |                 |
| CTD-2651B20.6                                                                        | RP1-151F17.1    | AC009299.3      | RP11-283I3.6    | RP11-747H7.3    |
| BUB3                                                                                 | AGFG1           | ABCA1           | none            | ALAS1           |

|         |          |         |          |
|---------|----------|---------|----------|
| C14orf1 | ANKRD17  | ABHD17C | ARHGEF6  |
| CRY2    | ASF1A    | AEN     | ASAH2B   |
| HMG20A  | BAG6     | AHCYL1  | ASF1A    |
| JAG1    | BUB3     | ANKIB1  | BET1     |
| KDM2A   | C14orf1  | ANKRD46 | BORA     |
| KLF5    | CABLES1  | ARHGAP6 | C18orf54 |
| NHEJ1   | CCNJ     | ARHGEF6 | C1orf52  |
| NXF1    | CDKN1B   | ARRDC4  | CBX1     |
| PGS1    | CNEP1R1  | ASB6    | CCL7     |
| UBXN2B  | CNN3     | BCL2L11 | CCNH     |
| WASL    | CRY2     | BCL2L2  | CRLF3    |
|         | CSRP2    | BIN3    | CSTF1    |
|         | DDIT4    | BLOC1S5 | DTWD1    |
|         | ERRFI1   | BSDC1   | DUSP5    |
|         | FAM8A1   | C2orf88 | EFHD2    |
|         | GART     | C5orf51 | FAM168B  |
|         | GNA12    | CAB39L  | FAXDC2   |
|         | GNG11    | CABLES1 | GAD1     |
|         | GPBP1L1  | CAMKK2  | GOLPH3L  |
|         | GRAP2    | CASP2   | HERPUD1  |
|         | HEMGN    | CBX1    | IRF2     |
|         | HMG20A   | CCL3    | KLF10    |
|         | HMGB3    | CCL3L3  | LMO7     |
|         | HSPA13   | CCL7    | MEIS1    |
|         | IER5     | CCNJ    | MICU3    |
|         | ING2     | CCNJL   | MINPP1   |
|         | ITPK1    | CD200R1 | N4BP1    |
|         | JAG1     | CDKN1A  | NEK7     |
|         | JKAMP    | CEBPB   | NEU1     |
|         | KDM2A    | CEP97   | NFYB     |
|         | KIAA0040 | CLP1    | NLK      |
|         | KLF10    | CNEP1R1 | NRGN     |
|         | KLF4     | CPD     | PATL1    |
|         | KLF5     | CPEB2   | PI4K2A   |

|          |         |         |
|----------|---------|---------|
| MMD      | CRLF3   | PKIA    |
| MSL2     | CRY2    | PLEKHF2 |
| MXD4     | CSRNP1  | PPIF    |
| NHEJ1    | CSTF1   | RPS3    |
| NLK      | CTPS1   | SEC23IP |
| NOG      | CTSB    | SPRY2   |
| NUDCD1   | CUL4B   | SPTSSB  |
| NXF1     | CWC22   | SUGT1   |
| PAPSS2   | DDIT3   | SYS1    |
| PCMTD1   | DENND2C | TFRC    |
| PGRMC1   | DTWD1   | TMED5   |
| PGS1     | DUSP16  | TMEM2   |
| PKIA     | DUSP4   | TMEM68  |
| PPP2CA   | DYNC1I2 | TNFSF11 |
| PPP2R2A  | EEA1    | TOP1    |
| PRKACB   | EFHD2   | TRIB1   |
| PRKAR2B  | EPB41L3 | UBE2H   |
| PSIP1    | ERCC4   | WHAMM   |
| RAB21    | EXOSC10 | YES1    |
| RG510    | FAS     | ZC3H13  |
| RHOQ     | FNIP2   | ZNF225  |
| RNF214   | FOSL2   | ZNF292  |
| RPAP3    | GCNT4   |         |
| SDC2     | GGA2    |         |
| SH2B3    | GINM1   |         |
| SLC25A16 | GNA13   |         |
| SMARCA1  | GNG5    |         |
| SURF4    | GPCPD1  |         |
| SYS1     | GPR132  |         |
| TFAM     | GPR180  |         |
| TFRC     | GRIA1   |         |
| TMEM106B | GRPEL2  |         |
| TNFAIP8  | HBEGF   |         |
| TSC22D1  | HERPUD1 |         |

|        |         |
|--------|---------|
| UBXN2B | HES1    |
| VEGFA  | HS2ST1  |
| WASL   | HSPA5   |
| WHAMM  | IL10    |
| XKR8   | INSIG2  |
| ZEB1   | IRF9    |
|        | IRG1    |
|        | ITGA6   |
|        | ITGB3   |
|        | JMJD6   |
|        | KIF2A   |
|        | KLF10   |
|        | KLF9    |
|        | LDLRAD4 |
|        | LIMK2   |
|        | LMLN    |
|        | MAP2K3  |
|        | MAP3K1  |
|        | MAPK6   |
|        | MAPK7   |
|        | MBLAC2  |
|        | MBNL1   |
|        | MBTPS2  |
|        | MED1    |
|        | MEF2D   |
|        | MFAP3L  |
|        | MGA     |
|        | MINPP1  |
|        | MXD1    |
|        | NEK7    |
|        | NFE2L2  |
|        | NFKBIZ  |
|        | NHLRC2  |
|        | NKX3-1  |

PAPSS2  
PATL1  
PCGF5  
PDCD10  
PDE12  
PET117  
PGRMC1  
PHF6  
PHLDA2  
PIGA  
PIGU  
PKIA  
PPIL1  
PPP2R2A  
PRKACB  
PTP4A1  
RBM41  
RCC2  
RGS16  
RHEB  
RHOQ  
RIOK3  
RIT1  
RPS3  
S1PR1  
SBDS  
SCAMP1  
SCYL3  
SDAD1  
SDC2  
SENP2  
SH2B3  
SKIL  
SLC25A16

SLC25A32  
SLC30A1  
SLC30A6  
SLC35A1  
SMAD7  
SMARCA1  
SOCS1  
SPIN1  
SPTSSB  
SSX2IP  
SUGT1  
SUPT20H  
SURF4  
TAF10  
TET1  
THBS1  
TMEM2  
TMEM68  
TMX1  
TNFRSF1B  
TRAF3  
TRANK1  
TRIB1  
TSC22D3  
UAP1  
UBE2H  
UBXN2B  
UGCG  
USP42  
USP44  
USP45  
VPS37B  
WASL  
XKR8

YTHDF3  
ZBTB10  
ZBTB26  
ZBTB5  
ZC4H2  
ZEB1  
ZNF10  
ZNF146  
ZNF148  
ZNF391  
ZNF583  
ZNF585A
