# Supplementary material for: Gene Expression Profiling in Fibromyalgia Indicates an Autoimmune Origin of the Disease and Opens New Avenues for Targeted Therapy
Source: MDPI journal article supplement (doi:10.3390/jcm9061814), 2020-06-10
Supplement: s1 [file s1]

|                       | Biological pathway                          | <i>p-value</i> |
|-----------------------|---------------------------------------------|----------------|
| Apoptosis             | TRAIL signaling pathway                     | <0.01          |
|                       | p53 pathway                                 | 0.01           |
|                       | Direct p53 effectors                        | 0.03           |
| Circadian rhythm      | Circadian rhythm pathway                    | <0.01          |
|                       | Circadian Clock                             | 0.02           |
| Endocrine system      | Plasma membrane estrogen receptor signaling | <0.01          |
| Immune response       | IL3-mediated signaling events               | <0.01          |
|                       | S1P1 pathway                                | <0.01          |
|                       | IL5-mediated signaling events               | <0.01          |
|                       | CDC42 signaling events                      | <0.01          |
|                       | Regulation of CDC42 activity                | <0.01          |
|                       | IL12-mediated signaling events              | <0.01          |
|                       | Cytokine Signaling in Immune system         | <0.01          |
|                       | Signaling by Interleukins                   | <0.01          |
|                       | IL23-mediated signaling events              | 0.01           |
|                       | LPA receptor mediated events                | 0.01           |
|                       | CD40/CD40L signaling                        | 0.02           |
|                       | TCR signaling in naive CD4+ T cells         | 0.02           |
|                       | Immune System                               | 0.02           |
|                       | IL2 signaling events mediated by PI3K       | 0.04           |
| Inflammatory response | GMCSF-mediated signaling events             | <0.01          |
|                       | AP-1 transcription factor network           | <0.01          |
|                       | PIP3 activates AKT signaling                | <0.01          |
|                       | TGFBR                                       | <0.01          |
|                       | Interleukin-1 signaling                     | <0.01          |
|                       | Alternative NF-kappaB pathway               | 0.01           |
|                       | Interleukin-1 processing                    | 0.01           |
|                       | Canonical NF-kappaB pathway                 | 0.01           |
|                       | CXCR4-mediated signaling events             | 0.02           |
|                       | TNF receptor signaling pathway              | 0.02           |
|                       | Toll Like Receptor 10 (TLR10) Cascade       | 0.02           |
|                       | Toll Like Receptor 7/8 (TLR7/8) Cascade     | 0.03           |
|                       | p38 MAPK signaling pathway                  | 0.03           |

|                                         |                                                                        |       |
|-----------------------------------------|------------------------------------------------------------------------|-------|
|                                         | Toll Like Receptor 9 (TLR9) Cascade                                    | 0.03  |
|                                         | MyD88 cascade initiated on plasma membrane                             | 0.04  |
|                                         | TNF alpha/NF-kB                                                        | 0.04  |
|                                         | Toll Like Receptor 5 (TLR5) Cascade                                    | 0.05  |
| <b>Metabolism</b>                       | LKB1 signaling events                                                  | <0.01 |
|                                         | Arf6 signaling events                                                  | <0.01 |
|                                         | mTOR signaling pathway                                                 | <0.01 |
|                                         | Insulin Pathway                                                        | <0.01 |
|                                         | IGF1 pathway                                                           | <0.01 |
|                                         | cholesterol biosynthesis I                                             | 0.03  |
|                                         | cholesterol biosynthesis III (via desmosterol)                         | 0.03  |
|                                         | cholesterol biosynthesis II (via 24,25-dihydrolanosterol)              | 0.03  |
|                                         | Beta-oxidation of pristanoyl-CoA                                       | 0.03  |
| <b>Neuronal system</b>                  | Signalling by NGF                                                      | <0.01 |
|                                         | p75(NTR)-mediated signaling                                            | 0.01  |
|                                         | NGF signalling via TRKA from the plasma membrane                       | 0.02  |
| <b>Pain perception and transmission</b> | IFN-gamma pathway                                                      | <0.01 |
|                                         | Class I PI3K signaling events                                          | <0.01 |
|                                         | Class I PI3K signaling events mediated by Akt                          | <0.01 |
|                                         | G-protein beta:gamma signalling                                        | 0.01  |
|                                         | Enkephalin release                                                     | 0.03  |
| <b>Vascular system</b>                  | ErbB receptor signaling network                                        | <0.01 |
|                                         | VEGF and VEGFR signaling network                                       | <0.01 |
|                                         | PAR1-mediated thrombin signaling events                                | <0.01 |
|                                         | Thrombin/protease-activated receptor (PAR) pathway                     | <0.01 |
|                                         | PDGF receptor signaling network                                        | <0.01 |
|                                         | Internalization of ErbB1                                               | <0.01 |
|                                         | Urokinase-type plasminogen activator (uPA) and uPAR-mediated signaling | <0.01 |
|                                         | EGFR-dependent Endothelin signaling events                             | <0.01 |
|                                         | Endothelins                                                            | <0.01 |
|                                         | GAB1 signalosome                                                       | <0.01 |
|                                         | ALK1 signaling events                                                  | <0.01 |
|                                         | PAR4-mediated thrombin signaling events                                | 0.01  |
|                                         | Thromboxane signalling through TP receptor                             | 0.03  |

Integrins in angiogenesis  
Signaling by EGFR

0.03  
0.04
