# Supplementary material for: Gene Expression Profiling in Fibromyalgia Indicates an Autoimmune Origin of the Disease and Opens New Avenues for Targeted Therapy
Source: MDPI journal article supplement (doi:10.3390/jcm9061814), 2020-06-10
Supplement: s1 [file s1]

## RHEUMATOID ARTHRITIS

| Biological Pathway                                           | <i>p-value</i> |
|--------------------------------------------------------------|----------------|
| Arf6 signalling events                                       | 0.040          |
| Class I PI3K signalling events                               | 0.040          |
| Class I PI3K signalling events mediated by Akt               | 0.040          |
| EGFR-dependent Endothelin signalling events                  | 0.041          |
| Endothelins                                                  | 0.040          |
| ErbB receptor signalling network                             | 0.045          |
| GMCSF-mediated signalling events                             | 0.025          |
| IFN-gamma pathway                                            | 0.028          |
| IGF1 pathway                                                 | 0.044          |
| IL3-mediated signalling events                               | 0.027          |
| IL5-mediated signalling events                               | 0.045          |
| Insulin Pathway                                              | 0.040          |
| Internalization of ErbB1                                     | 0.040          |
| mTOR signalling pathway                                      | 0.040          |
| PAR1-mediated thrombin signalling events                     | 0.031          |
| PDGF receptor signalling network                             | 0.047          |
| Plasma membrane oestrogen receptor signalling                | 0.033          |
| S1P1 pathway                                                 | 0.040          |
| Thrombin/protease-activated receptor (PAR) pathway           | 0.032          |
| Urokinase-type plasminogen activator (uPA) and uPAR-mediated | 0.040          |
| VEGF and VEGFR signalling network                            | 0.055          |
| Alpha9 beta1 integrin signalling events                      | 0.020          |
| Arf6 downstream pathway                                      | 0.040          |
| Arf6 trafficking events                                      | 0.040          |
| Beta1 integrin cell surface interactions                     | 0.026          |
| EGF receptor (ErbB1) signalling pathway                      | 0.040          |
| ErbB1 downstream signalling                                  | 0.040          |
| Glypican 1 network                                           | 0.056          |
| Glypican pathway                                             | 0.055          |
| Integrin family cell surface interactions                    | 0.032          |
| Integrin-linked kinase signalling                            | 0.053          |
| Nectin adhesion pathway                                      | 0.049          |
| PDGFR-beta signalling pathway                                | 0.040          |
| Proteoglycan syndecan-mediated signalling events             | 0.006          |
| Signalling events mediated by focal adhesion kinase          | 0.040          |
| Signalling events mediated by hepatocyte growth factor recep | 0.047          |
| Signalling events mediated by VEGFR1 and VEGFR2              | 0.051          |
| Sphingosine 1-phosphate (S1P) pathway                        | 0.045          |
| Syndecan-1-mediated signalling events                        | 0.032          |

## FYBROMIALGIA

| Biological pathway    | <i>p-value</i> |
|-----------------------|----------------|
| Arf6 signaling events | <0.01          |

|                                                              |       |
|--------------------------------------------------------------|-------|
| Class I PI3K signaling events                                | <0.01 |
| Class I PI3K signaling events mediated by Akt                | <0.01 |
| EGFR-dependent Endothelin signaling events                   | <0.01 |
| Endothelins                                                  | <0.01 |
| ErbB receptor signaling network                              | <0.01 |
| GMCSF-mediated signaling events                              | <0.01 |
| IFN-gamma pathway                                            | <0.01 |
| IGF1 pathway                                                 | <0.01 |
| IL3-mediated signaling events                                | <0.01 |
| IL5-mediated signaling events                                | <0.01 |
| Insulin Pathway                                              | <0.01 |
| Internalization of ErbB1                                     | <0.01 |
| mTOR signaling pathway                                       | <0.01 |
| PAR1-mediated thrombin signaling events                      | <0.01 |
| PDGF receptor signaling network                              | <0.01 |
| Plasma membrane estrogen receptor signaling                  | <0.01 |
| S1P1 pathway                                                 | <0.01 |
| Thrombin/protease-activated receptor (PAR) pathway           | <0.01 |
| Urokinase-type plasminogen activator (uPA) and uPAR-mediated | <0.01 |
| VEGF and VEGFR signaling network                             | <0.01 |
| ALK1 signaling events                                        | <0.01 |
| Alternative NF-kappaB pathway                                | 0.01  |
| AP-1 transcription factor network                            | <0.01 |
| Beta-oxidation of pristanoyl-CoA                             | 0.03  |
| Canonical NF-kappaB pathway                                  | 0.01  |
| CD40/CD40L signaling                                         | 0.02  |
| CDC42 signaling events                                       | <0.01 |
| cholesterol biosynthesis I                                   | 0.03  |
| cholesterol biosynthesis II (via 24,25-dihydrolanosterol)    | 0.03  |
| cholesterol biosynthesis III (via desmosterol)               | 0.03  |
| Circadian Clock                                              | 0.02  |
| Circadian rhythm pathway                                     | <0.01 |
| CXCR4-mediated signaling events                              | 0.01  |
| Cytokine Signaling in Immune system                          | <0.01 |
| Direct p53 effectors                                         | 0.03  |
| Enkephalin release                                           | 0.03  |
| GAB1 signalosome                                             | <0.01 |
| G-protein beta:gamma signalling                              | 0,01  |
| IL12-mediated signaling events                               | <0.01 |
| IL2 signaling events mediated by PI3K                        | 0.04  |
| IL23-mediated signaling events                               | 0.01  |
| Immune System                                                | 0.02  |
| Integrins in angiogenesis                                    | 0.03  |
| Interleukin-1 processing                                     | 0.01  |
| Interleukin-1 signaling                                      | <0.01 |
| LKB1 signaling events                                        | <0.01 |
| LPA receptor mediated events                                 | 0.01  |

|                                                  |       |
|--------------------------------------------------|-------|
| MyD88 cascade initiated on plasma membrane       | 0.04  |
| NGF signalling via TRKA from the plasma membrane | 0.02  |
| p38 MAPK signaling pathway                       | 0.03  |
| p53 pathway                                      | 0.01  |
| p75(NTR)-mediated signaling                      | 0.01  |
| PAR4-mediated thrombin signaling events          | 0.01  |
| PIP3 activates AKT signaling                     | <0.01 |
| Regulation of CDC42 activity                     | <0.01 |
| Signaling by EGFR                                | 0.04  |
| Signaling by Interleukins                        | <0.01 |
| Signalling by NGF                                | <0.01 |
| TCR signaling in naive CD4+ T cells              | 0.02  |
| TGFBR                                            | <0.01 |
| Thromboxane signalling through TP receptor       | 0.03  |
| TNF alpha/NF-kB                                  | 0.04  |
| TNF receptor signaling pathway                   | 0.02  |
| Toll Like Receptor 10 (TLR10) Cascade            | 0.02  |
| Toll Like Receptor 5 (TLR5) Cascade              | 0.05  |
| Toll Like Receptor 7/8 (TLR7/8) Cascade          | 0.03  |
| Toll Like Receptor 9 (TLR9) Cascade              | 0.03  |
| TRAIL signaling pathway                          | <0.01 |
