# Supplementary material for: Gene Expression Profiling in Fibromyalgia Indicates an Autoimmune Origin of the Disease and Opens New Avenues for Targeted Therapy
Source: MDPI journal article supplement (doi:10.3390/jcm9061814), 2020-06-10
Supplement: s1 [file s1]

**Module associated targeted FM genes**

| Targeted FM genes | Module | LncRNA       |
|-------------------|--------|--------------|
| BUB3              | M3     | CTD2651B20.6 |
| CRY2              | M6     | CTD2651B20.6 |
| JAG1              | M5     | CTD2651B20.6 |
| WASL              | M5     | CTD2651B20.6 |
| AGFG1             | M5     | RP1-151F17.1 |
| BUB3              | M3     | RP1-151F17.1 |
| CDKN1B            | M4     | RP1-151F17.1 |
| CRY2              | M6     | RP1-151F17.1 |
| GNA12             | M5     | RP1-151F17.1 |
| GNG11             | M2     | RP1-151F17.1 |
| JAG1              | M5     | RP1-151F17.1 |
| PPP2CA            | M3     | RP1-151F17.1 |
| PPP2R2A           | M4     | RP1-151F17.1 |
| PRKAR2B           | M3     | RP1-151F17.1 |
| SDC2              | M5     | RP1-151F17.1 |
| SURF4             | M5     | RP1-151F17.1 |
| TFRC              | M5     | RP1-151F17.1 |
| VEGFA             | M3     | RP1-151F17.1 |
| WASL              | M5     | RP1-151F17.1 |
| ZEB1              | M4     | RP1-151F17.1 |
| ADB6              | M1     | AC009299.3   |
| BCL2L11           | M4     | AC009299.3   |
| CCL3              | M2     | AC009299.3   |
| CCL7              | M3     | AC009299.3   |
| CDKN1A            | M4     | AC009299.3   |
| CEBPB             | M6     | AC009299.3   |
| CEP97             | M3     | AC009299.3   |
| CLP1              | M4     | AC009299.3   |
| CRY2              | M6     | AC009299.3   |
| CSTF1             | M4     | AC009299.3   |
| CTPS1             | M6     | AC009299.3   |
| CTSB              | M5     | AC009299.3   |

|          |    |              |
|----------|----|--------------|
| CWC22    | M4 | AC009299.3   |
| DDIT3    | M6 | AC009299.3   |
| EXOSC10  | M5 | AC009299.3   |
| FAS      | M5 | AC009299.3   |
| GNA13    | M5 | AC009299.3   |
| GNG5     | M2 | AC009299.3   |
| GRIA1    | M4 | AC009299.3   |
| HBEGF    | M5 | AC009299.3   |
| HSPA5    | M4 | AC009299.3   |
| IL10     | M3 | AC009299.3   |
| KIF2A    | M3 | AC009299.3   |
| NHLRC2   | M3 | AC009299.3   |
| PPIL1    | M4 | AC009299.3   |
| PPP2R2A  | M4 | AC009299.3   |
| RCC2     | M3 | AC009299.3   |
| RPS3     | M6 | AC009299.3   |
| S1PR1    | M2 | AC009299.3   |
| SDC2     | M5 | AC009299.3   |
| SOCS1    | M1 | AC009299.3   |
| SURF4    | M5 | AC009299.3   |
| THBS1    | M3 | AC009299.3   |
| TNFRSF1B | M2 | AC009299.3   |
| TRAF3    | M3 | AC009299.3   |
| UBE2H    | M1 | AC009299.3   |
| WASL     | M5 | AC009299.3   |
| ZEB1     | M4 | AC009299.3   |
| BET1     | M4 | RP11-747H7.3 |
| BORA     | M3 | RP11-747H7.3 |
| CCL7     | M3 | RP11-747H7.3 |
| CCNH     | M5 | RP11-747H7.3 |
| CSTF1    | M4 | RP11-747H7.3 |
| LMO7     | M1 | RP11-747H7.3 |
| MEIS1    | M5 | RP11-747H7.3 |
| RPS3     | M6 | RP11-747H7.3 |

|         |    |              |
|---------|----|--------------|
| SEC23IP | M4 | RP11-747H7.3 |
| TFRC    | M5 | RP11-747H7.3 |
| TNFSF11 | M2 | RP11-747H7.3 |
| UBE2H   | M1 | RP11-747H7.3 |
