# Supplementary material for: Gene Expression Profiling in Fibromyalgia Indicates an Autoimmune Origin of the Disease and Opens New Avenues for Targeted Therapy
Source: J Clin Med. 2020 Jun 10;9(6):1814. doi: 10.3390/jcm9061814 (PMC7356177; doi:10.3390/jcm9061814)
Supplement: Supplementary file 1 [file jcm-09-01814-s001.zip]

Archive with 11 entries (11 files):
- Supplementary figure 1.pdf
- Supplementary figure 2 def.pdf
- Supplementary figure 3 def.pdf
- Supplementary table 1.pdf
- Supplementary table 2.pdf
- Supplementary table 3.pdf
- Supplementary table 4.pdf
- Supplementary table 5.pdf
- Supplementary table 6.pdf
- Supplementary table 7.pdf
- Supplementary table 8.pdf
