# Supplementary figures and images for: Gene Expression Profiling in Fibromyalgia Indicates an Autoimmune Origin of the Disease and Opens New Avenues for Targeted Therapy
Source: MDPI journal article supplement (doi:10.3390/jcm9061814), 2020-06-10

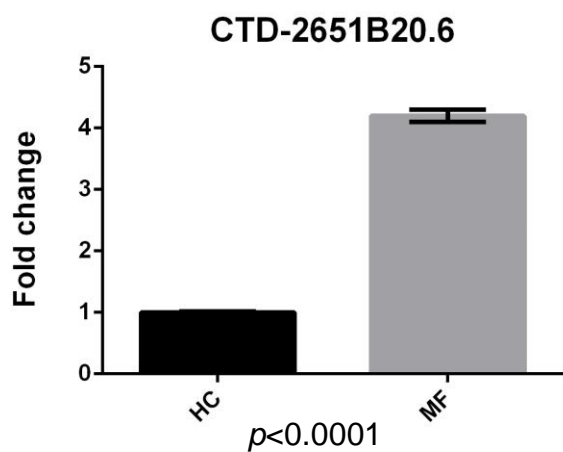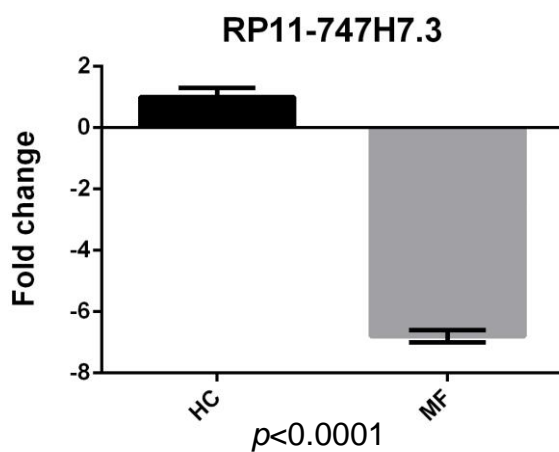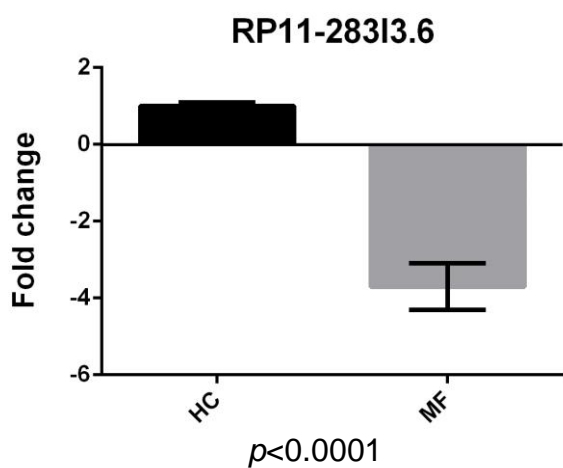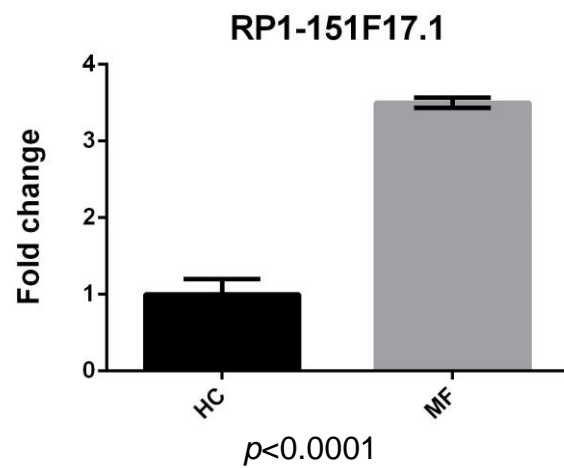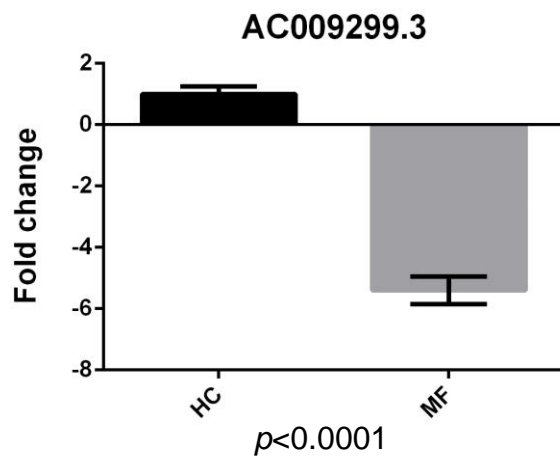

Supplement: s1 [file s1]

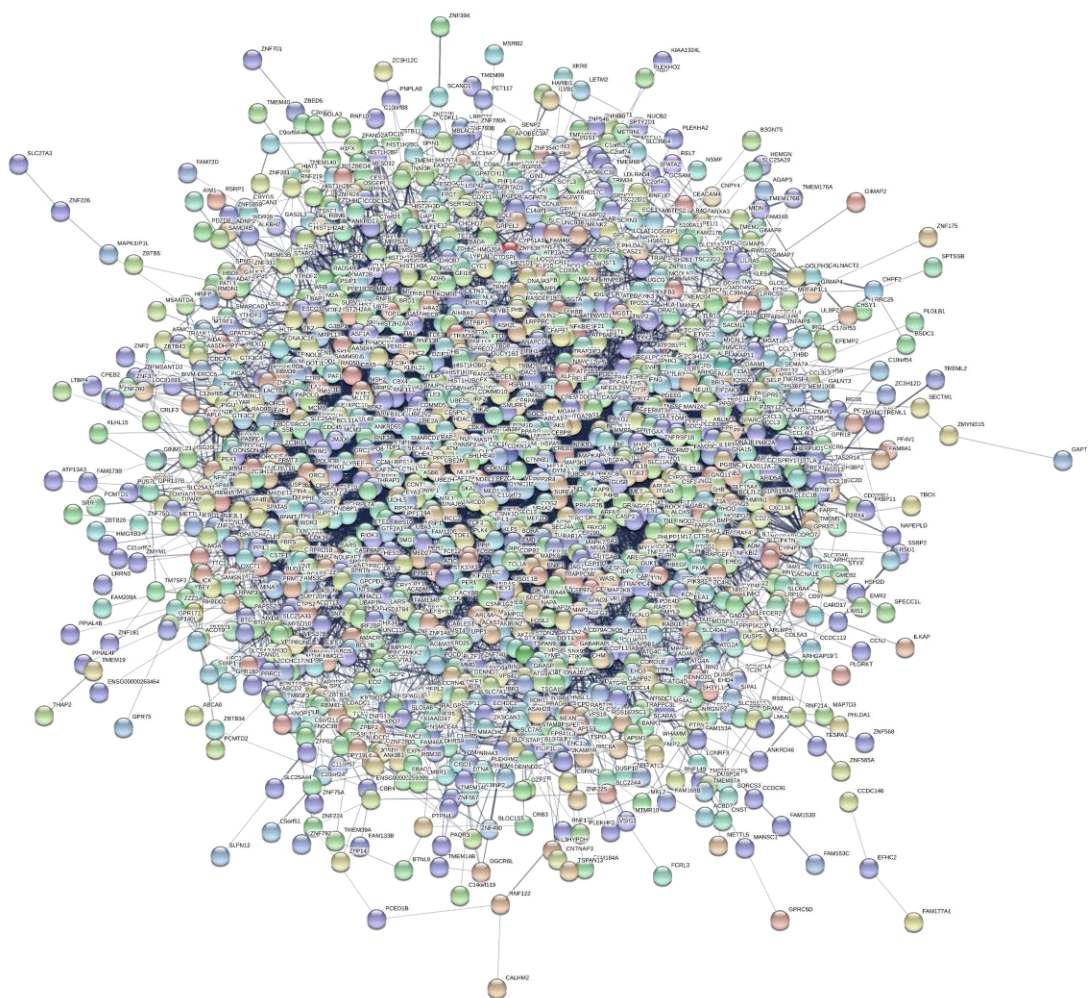

Supplement: s1 [file s1]

TGF-beta

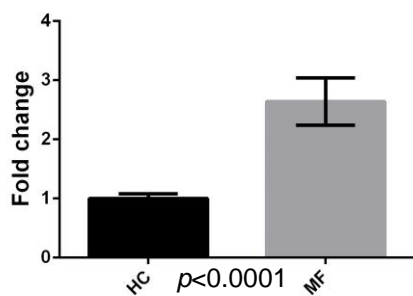

IL-6

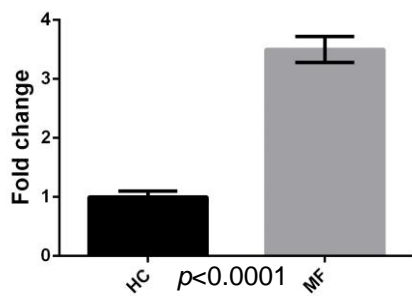

IL-21

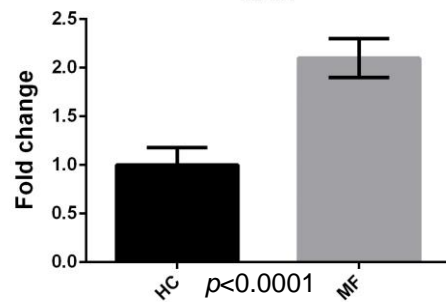

IL-23

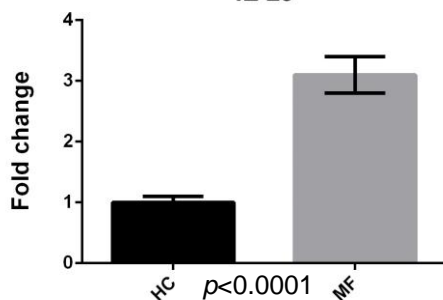

IL-17

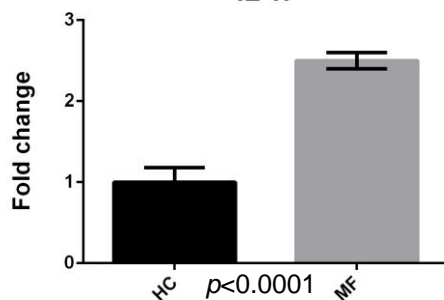

TNF

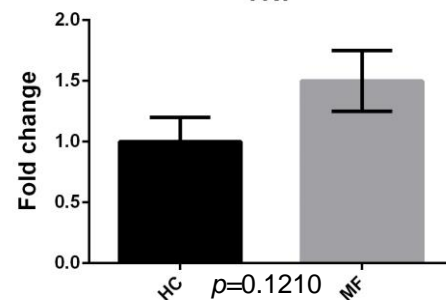

IL-10

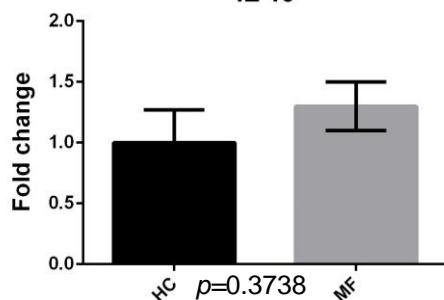

IL-8

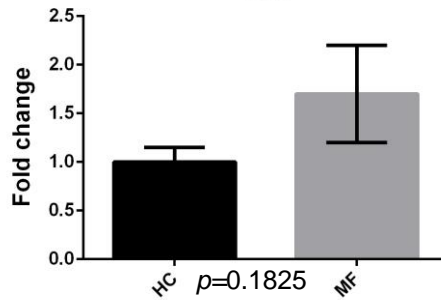

IL-1

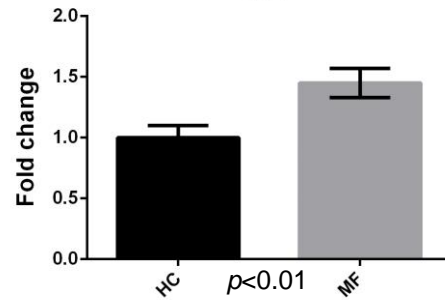

IL-2

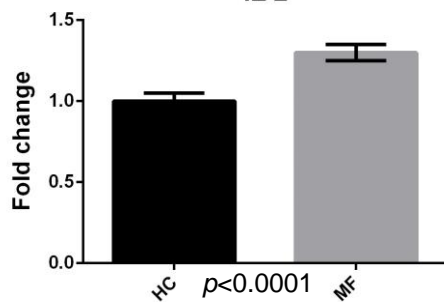

IL-4

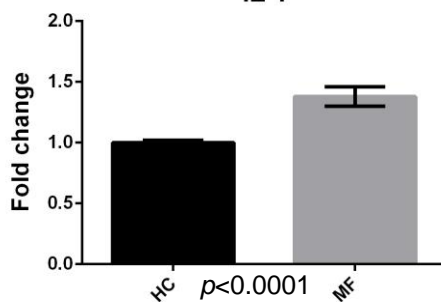

Tie-2

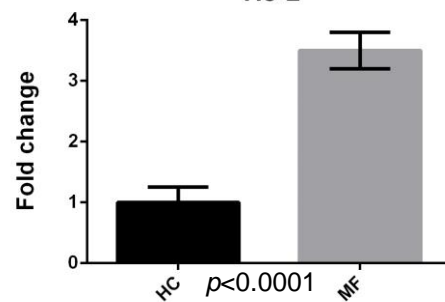

TARC

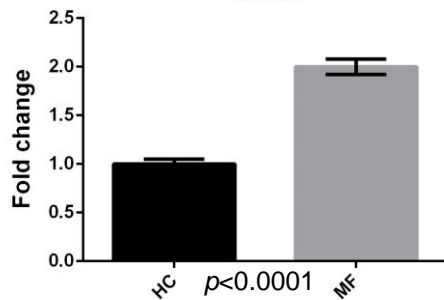

SAA

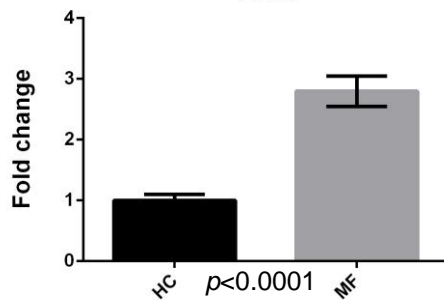

Supplement: s1 [file s1]
